# Supplementary material for: Development and refurbishment of energy-efficient residential districts based on collective self-organised housing processes
Source: Royal Society of Chemistry journal article supplement (doi:10.1039/d1fo04109f), 2012-01-01
Supplement: d1fo04109f1.pdf [file d1fo04109f1.pdf]

1  
2  
3  
4  
5  
6  
7  
8  
9  
10  
11  
12  
13  
14  
15  
16  
17  
18  
19  
20  
21  
22  
23  
24  
25  
26

**Corn distillers solubles as a new source of bioactive peptides with ACE and  
DPP-IV inhibition activity: characterization, in-silico evaluation, and  
molecular docking**

Sonu Sharma<sup>a</sup>, Ranjan Pradhan<sup>a,b</sup>, Annamalai Manickavasagan<sup>a</sup>, Mahendra Thimmanagari<sup>c</sup>  
Animesh Dutta<sup>a</sup>

<sup>a</sup>School of Engineering, University of Guelph, Guelph, Ontario, Canada N1G 2W1

<sup>b</sup>Shrimp Canada, 67 Watson Rd. S (Unit - 2), Guelph, Ontario, N1L 1 E3, Canada

<sup>c</sup>Food and Rural Affairs, Ontario Ministry of Agriculture, 1 Stone Road West, Guelph N1G 4Y1,  
Ontario, Canada

Number of Tables: 4

Number of Figures: 2

Total = 6

27 **Abbreviations:**

28 ACE - Angiotensin I-converting enzyme

29 DPP IV - Dipeptidyl peptidase IV

30 DPP III - Dipeptidyl peptidase III

31 AAs - Amino acids

32 CDS - Corn distillers solubles

33 PHs – Protein hydrolysates

34 PCA - Principle component analysis

35 PC – Protein concentrate

36 PF – Protein fraction

37 LC-MS - Liquid chromatography coupled to mass spectrometry

38  $M_w$  - Molecular weight

39 DS – Discovery Studio

40 DH – Degree of hydrolysis

41 H-bond – hydrogen bonding

42 PH-Ala – Protein hydrolysate prepared by alcalase

43 PH-Pap - Protein hydrolysate prepared by papain

44 PH-Tryp – Protein hydrolysate prepared by trypsin

45 PH-Fla – Protein hydrolysate prepared by flavorzyme

46 CGM – Corn gluten meal

47 Ala – alanine; Val – valine; Leu – leucine; Ile – isoleucine; Gly – glycine; Pro – proline; Ser –

48 serine; Thr – threonine; Asn – asparagine; Tyr – tyrosine; Trp – trptophan; Phe – phenylalanine;

49 Asp – aspartic acid; Glu – glutamic acid; Gln – glutamine; Lys – lysine; His – histidine; Arg –

50 arginine; Met – methionine.

51

52

53

54

## Section1.

### Molecular weight analysis

A PLRP-S column (1000 Å, 5 µm, Agilent) was used for the separation of protein from detergents with the following solvents: water with 0.1% formic acid for A and acetonitrile with 0.1 % formic acid for B. The mobile phase gradient was as follows: initial conditions, 30% B for 5 min increasing to 85% B in 5 min and then to 95% B in 0.10 more min followed by column wash at 95% B and 5 min re-equilibration. The first 2 and last 5 min of the gradient were sent to waste and not the spectrometer. The flow rate and sample volume were maintained at 0.3 mL.min<sup>-1</sup> and 2 µl. Further settings were similar to those described in **section 2.3**. Data were analyzed by MassHunter Qualitative Analysis software (version B.06.00, Agilent). Deconvolution of m/z spectrum was achieved using maximum entropy algorithm within BioConfirm software (Agilent).

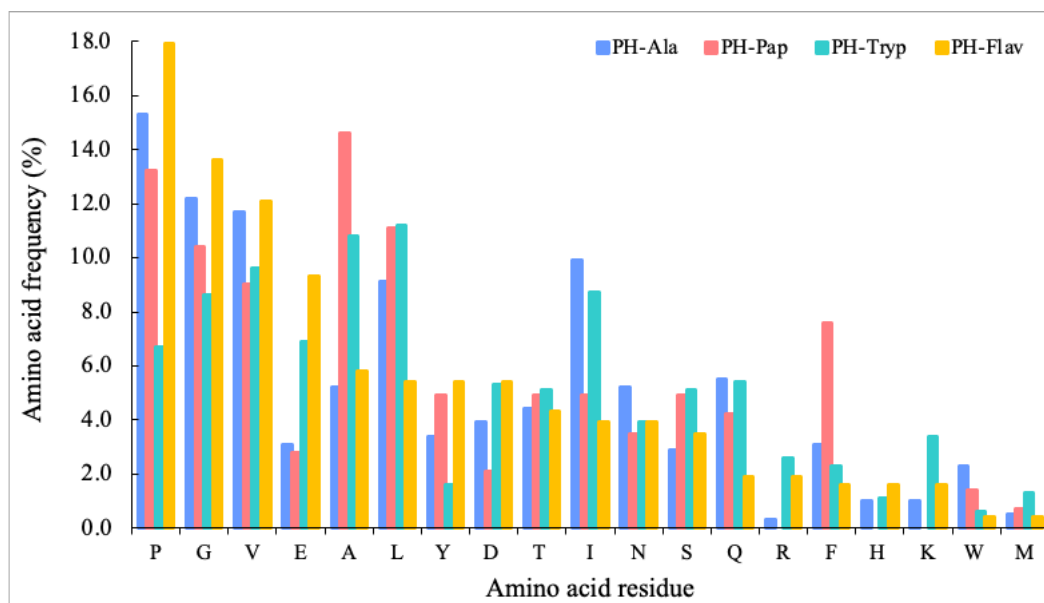

**Fig. 1S** Amino acid composition of PH-Ala, PH-Pap, PH-Tryp, PH-Flav built on the peptides characterized by mass spectrometry.

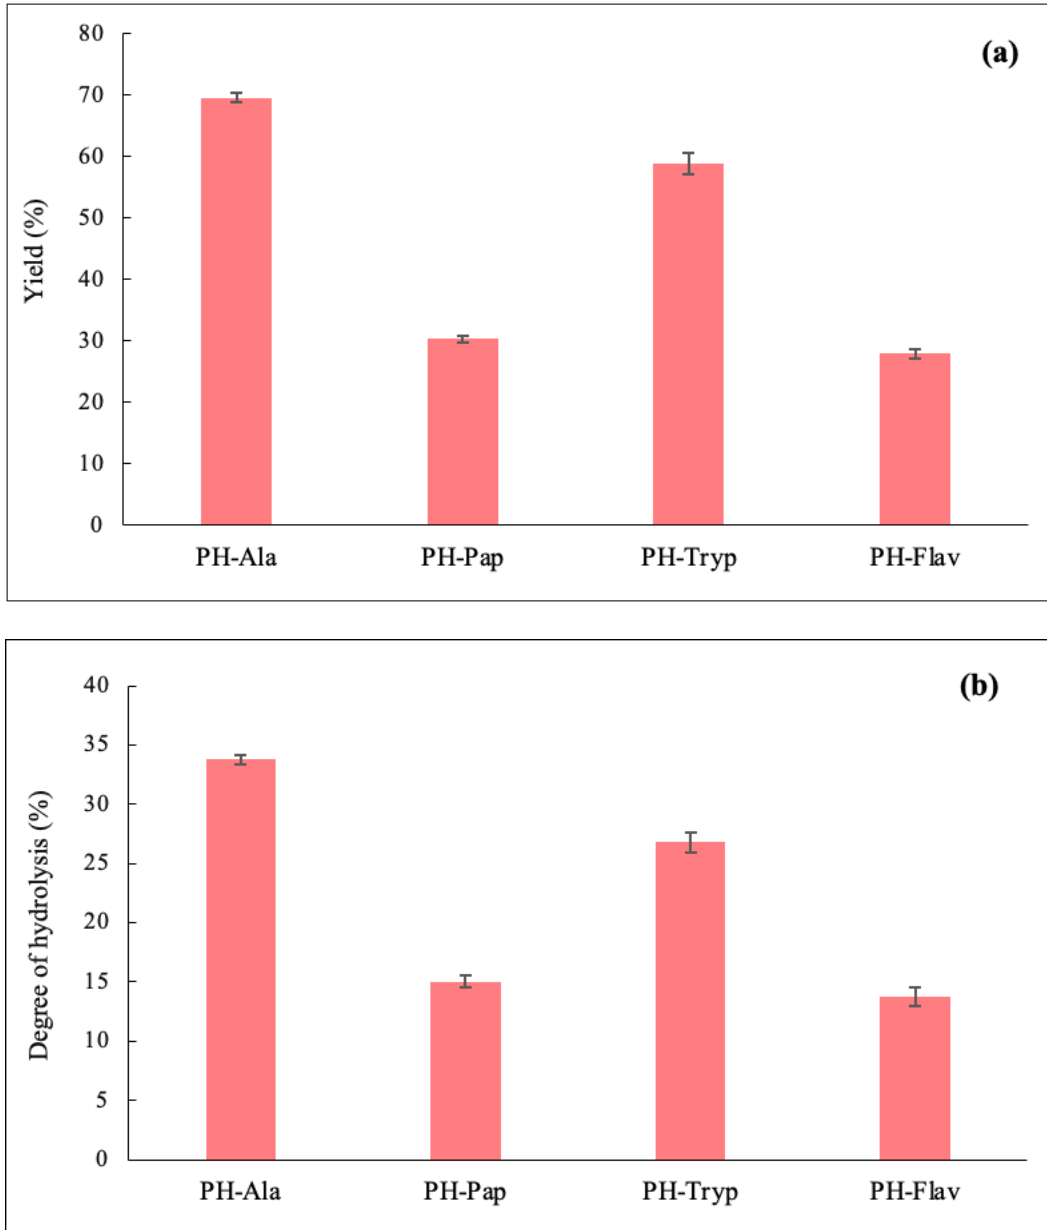

**Fig. 2S.** Variations in the (a) yields, (b) degree of hydrolysis of different protein hydrolysate prepared by four different proteases.



**Table 1S** Protease products and their optimal conditions for producing CDS protein hydrolysates in this study.

| Enzyme                         | pH,<br>temperature | Source of<br>enzyme                  | Activity                  | EC<br>number      | Activity <sup>a</sup>                    | Substrate<br>specificity and<br>preference <sup>b</sup>                                                   |
|--------------------------------|--------------------|--------------------------------------|---------------------------|-------------------|------------------------------------------|-----------------------------------------------------------------------------------------------------------|
| Alcalase <sup>®</sup><br>2.4 L | [pH<br>55°C]       | 8, <i>Bacillus<br/>licheniformis</i> | Serine<br>Endoprotease    | EC:<br>3.4.21.62  | ≥ 2.4 U/g                                | Broad specificity;<br>Ala, Ser at P1;<br>Tyr, Trp, Phe, and<br>Leu position                               |
| Papain                         | [pH<br>25°C]       | 6.2, Papaya latex                    | Cysteine<br>Endoprotease  | EC:<br>3.4.22.2   | 1.5-10<br>units/mg<br>solid              | Fairly broad<br>specificity; Arg<br>and Phe at P1; Leu,<br>Phe at P2; Gln at<br>P10 and P20; Asp<br>at P4 |
| Trypsin                        | [pH<br>37°C]       | 8, Porcine<br>pancreas               | Serine<br>Endoprotease    | EC:<br>3.4.21.4   | 1,000-<br>2,000<br>units/mg<br>dry solid | Preferential<br>cleavage of N-<br>terminal Arg and<br>Lys at P1 position                                  |
| Flavorzyme                     | [pH<br>55°C]       | 7, <i>Aspergillus<br/>oryzae</i>     | Endo- and<br>exo-protease | EC: 232-<br>752-2 | ≥ 500 U/g                                | Preferential<br>cleavage of a C-<br>terminal dipeptide,<br>oligopeptide<br>position                       |

<sup>a</sup>As specified by Sigma Sigma-Aldrich (Oakville, Ontario, Canada). <sup>b</sup>Information taken from previous studies (Zhu et al., 2019); (Cheung & Li Chan, 2017).s

**Table 2Sa.** The independent factors with levels (actual and coded) considered for optimizing alcalase hydrolysis.

| Factors                     | Levels    |    |     |    |           |
|-----------------------------|-----------|----|-----|----|-----------|
|                             | $-\alpha$ | -1 | 0   | +1 | $+\alpha$ |
| Incubation time (hrs)       | 0.14      | 2  | 6.5 | 11 | 12.86     |
| Enzyme: Substrate (E:S) (%) | 0.76      | 2  | 5   | 8  | 9.24      |

**Table 2Sb.** The independent factors with levels (actual and coded) considered for optimizing trypsin hydrolysis.

| Factors                     | Levels    |    |     |    |           |
|-----------------------------|-----------|----|-----|----|-----------|
|                             | $-\alpha$ | -1 | 0   | +1 | $+\alpha$ |
| Incubation time (hrs)       | 0.14      | 2  | 6.5 | 11 | 12.86     |
| Enzyme: Substrate (E:S) (%) | 0.76      | 2  | 5   | 8  | 9.24      |

**Table 2Sc.** The independent factors with levels (actual and coded) considered for optimizing papain hydrolysis.

| Factors                     | Levels    |     |     |    |           |
|-----------------------------|-----------|-----|-----|----|-----------|
|                             | $-\alpha$ | -1  | 0   | +1 | $+\alpha$ |
| Incubation time (hrs)       | 0.6       | 1.5 | 3.8 | 6  | 6.9       |
| Enzyme: Substrate (E:S) (%) | 2.2       | 3   | 5   | 7  | 7.8       |

**Table 2Sd.** The independent factors with levels (actual and coded) considered for optimizing flavorzyme hydrolysis.

| Factors                     | Levels    |    |   |    |           |
|-----------------------------|-----------|----|---|----|-----------|
|                             | $-\alpha$ | -1 | 0 | +1 | $+\alpha$ |
| Incubation time (hrs)       | 0.76      | 2  | 5 | 8  | 9.2       |
| Enzyme: Substrate (E:S) (%) | 1.17      | 2  | 4 | 6  | 6.83      |





**Table 3S** Predicted angiotensin-converting enzyme (ACE) inhibitory activity (IC<sub>50</sub>) of dipeptides, tripeptides and tetrapeptides encrypted in peptides<sup>a</sup> of ultrafiltered protein hydrolysate fraction (<3 kDa).

| Sequence | IC <sub>50</sub> <sup>b</sup> (μmol/L) | Sequence   | IC <sub>50</sub> <sup>b</sup> μmol/L) | Sequence   | IC <sub>50</sub> <sup>b</sup> μmol/L) |
|----------|----------------------------------------|------------|---------------------------------------|------------|---------------------------------------|
| AA       | <b>51.40</b>                           | IA         | 153                                   | PG         | 17000                                 |
| AAP      | 30                                     | IG         | 1200                                  | PPL        | >1000                                 |
| AF       | 190                                    | IP         | 130                                   | PT         | n.a.                                  |
| AG       | 2500                                   | IPP        | 5                                     | TG         | 9900                                  |
| AI       | 690                                    | ILP        | 270                                   | TGP        | n.a.                                  |
| ALP      | 240                                    | IL         | n.a.                                  | RL         | 746.40                                |
| ALPP     | 280                                    | KF         | 1160                                  | RP         | 21                                    |
| AP       | 322                                    | <b>KP</b>  | <b>22</b>                             | SF         | 130.2                                 |
| AV       | 800                                    | KG         | n.a.                                  | SY         | 66.3                                  |
| AVL      | 1.67-930                               | KGP        | n.a.                                  | TF         | 18                                    |
| DF       | 360                                    | LA         | n.a.                                  | TP         | 290                                   |
| DG       | 12.3                                   | LF         | 349                                   | VAA        | 13                                    |
| EG       | 10000                                  | LLF        | 79.8                                  | <b>VAP</b> | <b>2</b>                              |
| FG       | 3700                                   | LLP        | 57                                    | VM         | n.a.                                  |
| FQ       | <20 mM                                 | LQ         | n.a.                                  | VF         | 49.7                                  |
| FNQ      | 335                                    | LG         | 8800                                  | VMP        | 29                                    |
| GA       | 2000                                   | <b>LQP</b> | <b>2</b>                              | VP         | 420                                   |
| GD       | 9200                                   | LPF        | 10.59                                 | VLP        | n.d.                                  |
| GG       | 7200                                   | LPP        | 9.60                                  | VG         | n.a.                                  |
| GE       | <20 mM                                 | LR         | n.a.                                  | VSP        | 10                                    |
| GF       | 277.90                                 | <b>LSP</b> | <b>1.70</b>                           | VW         | 3.1                                   |
| GL       | <20 mM                                 | LSPA       | 315                                   | VWP        | n.a.                                  |
| GLY      | 1.67-930                               | LY         | 38.5                                  | WL         | 29.90                                 |
| GP       | 360                                    | LY         | 38.5                                  | WG         | 5900                                  |
| GPP      | n.a.                                   | NG         | 12000                                 | YA         | 460                                   |
| GPL      | 2.55                                   | <b>QP</b>  | <b>65.80</b>                          | YL         | 82                                    |
| GI       | 1300                                   | PL         | n.a.                                  | YY         | n.a.                                  |
| GPV      | 4.67                                   | PLP        | 430                                   | YP         | 720                                   |
| GQ       | 1910                                   | PP         | n.a.                                  | YK         | 610                                   |

|    |      |    |      |     |       |
|----|------|----|------|-----|-------|
| GS | 3800 | GW | 30   | HLL | 22.20 |
| GT | 5700 | HG | 6300 | HP  | n.a.  |
| GV | 4600 | HL | 3200 |     |       |

<sup>a</sup>Peptide fragments (alphabetical order) with ACE inhibitory activity were identified by BIOPAP database as mentioned in Table 2a and 2b. <sup>b</sup>IC<sub>50</sub> is the quantity of peptides needed to inhibit 50% of the enzymatic activity. Values were computed AHTPDB databases <sup>c</sup>n.a. means IC<sub>50</sub> value not available. A = alanine, D = aspartic acid, F = phenylalanine, G = glycine, H = histidine, I = isoleucine, K = lysine, L = leucine, M = methionine, P = proline, Q = glutamine, R = arginine, S = serine, T = threonine, V = valine, W = tryptophan.

**Table 4S** Predicted DPP IV inhibitory activity (IC50) of dipeptides, tripeptides and tetrapeptides encrypted in peptides<sup>a</sup> of ultrafiltered protein hydrolysate fraction (<3 kDa).

| Fragments with DPP IV inhibition combined with their Frequency of occurrence                                                                                                                                                                                                                                                                                                                                                                                                        |
|-------------------------------------------------------------------------------------------------------------------------------------------------------------------------------------------------------------------------------------------------------------------------------------------------------------------------------------------------------------------------------------------------------------------------------------------------------------------------------------|
| <b>AA</b> [A = 0.50, B = $5.32 \times 10^{-5}$ ], <b>AF</b> [A = 0.50], <b>AG</b> [A = 0.50], <b>AE</b> [A = 0.50], <b>AL</b> [A = 0.50, B = $5.67 \times 10^{-4}$ ], <b>AS</b> [A = 0.50]                                                                                                                                                                                                                                                                                          |
| <b>DN</b> [A = 0.50], <b>DA</b> [A = 0], <b>DP</b> [A = 0.50]                                                                                                                                                                                                                                                                                                                                                                                                                       |
| <b>EG</b> [A = 0.50], <b>EP</b> [A = 0.50], <b>ES</b> [A = 0.50]                                                                                                                                                                                                                                                                                                                                                                                                                    |
| <b>FL</b> [A = 0.50, B = $125 \times 10^{-5}$ ], <b>FN</b> [A = 0.50], <b>FP</b> [A = 0.50, B = $137 \times 10^{-5}$ ], <b>FQ</b> [A = 0.50]                                                                                                                                                                                                                                                                                                                                        |
| <b>GF</b> [A = 0.50], <b>GA</b> [A = 0.50], <b>GI</b> [A = 0.50], <b>GE</b> [A = 0.50], <b>GP</b> [A = 0.50, B = $5.16 \times 10^{-5}$ ], <b>GPM</b> [A = 1.0, B = $83.20 \times 10^{-5}$ ], <b>GG</b> [A = 0.50], <b>GL</b> [A = 0.50, B = $19.12 \times 10^{-5}$ ], <b>GW</b> [A = 0.50], <b>GV</b> [A = 0.50]                                                                                                                                                                    |
| <b>HP</b> [A = 0.50, B = $17.73 \times 10^{-5}$ ], <b>HL</b> [A = 0.50, B = $341.19 \times 10^{-5}$ ], <b>HT</b> [A = 0.50, B = $19.12 \times 10^{-5}$ ], <b>HI</b> [A = 0.50]                                                                                                                                                                                                                                                                                                      |
| <b>IA</b> [A = 0.50], <b>IN</b> [A = 0.50], <b>IL</b> [A = 0.50], <b>II</b> [A = 0.50], <b>IP</b> [A = 0.50, B = $21.95 \times 10^{-5}$ ]                                                                                                                                                                                                                                                                                                                                           |
| <b>KG</b> [A = 0.50]                                                                                                                                                                                                                                                                                                                                                                                                                                                                |
| <b>LA</b> [A = 0.50], <b>LP</b> [A = 0.50, B = $21.10 \times 10^{-5}$ ], <b>LM</b> [A = 0.50], <b>LPL</b> [A = 1.0, B = $83.20 \times 10^{-5}$ ], <b>LN</b> [A = 0.50], <b>LL</b> [A = 0.50], <b>LQP</b> [A = 0.67, B = $28.22 \times 10^{-5}$ ], <b>LV</b> [A = 0.50]                                                                                                                                                                                                              |
| <b>MP</b> [A = 0.50, B = $57.47 \times 10^{-5}$ ], <b>MK</b> [A = 0.50]                                                                                                                                                                                                                                                                                                                                                                                                             |
| <b>NP</b> [A = 0.50], <b>ND</b> [A = 0.50], <b>NG</b> [A = 0.50], <b>NQ</b> [A = 0.50], <b>NL</b> [A = 0.50]                                                                                                                                                                                                                                                                                                                                                                        |
| <b>PA</b> [A = 0.50], <b>PF</b> [A = 0.50], <b>PG</b> [A = 0.50], <b>PI</b> [A = 0.50], <b>PL</b> [A = 0.50], <b>PM</b> [A = 0.50], <b>PK</b> [A = 0.50], <b>PT</b> [A = 0.50], <b>PPL</b> [A = 1.0, B = $91.13 \times 10^{-5}$ ], <b>PV</b> [A = 0.50], <b>PP</b> [A = 0.50, B = $8.53 \times 10^{-5}$ ], <b>PPG</b> [A = 1.00, B = $20.49 \times 10^{-5}$ ], <b>PS</b> [A = 0.50], <b>PY</b> [A = 0.50], <b>PPPP</b> [A = 1.00, B = $12.80 \times 10^{-5}$ ], <b>PW</b> [A = 0.5] |
| <b>QP</b> [A = 0.50], <b>QL</b> [A = 0.50], <b>QH</b> [A = 0.50], <b>QQ</b> [A = 0.50], <b>QF</b> [A = 0.50]                                                                                                                                                                                                                                                                                                                                                                        |
| <b>RP</b> [A = 0.50, B = $22.32 \times 10^{-5}$ ], <b>RN</b> [A = 0.50]                                                                                                                                                                                                                                                                                                                                                                                                             |
| <b>SL</b> [A = 0.50, B = $19.86 \times 10^{-5}$ ], <b>SF</b> [A = 0.50], <b>SY</b> [A = 0.50], <b>SP</b> [A = 0.50, B = $8.36 \times 10^{-5}$ ]                                                                                                                                                                                                                                                                                                                                     |
| <b>TG</b> [A = 0.50], <b>TR</b> [A = 0.50], <b>TP</b> [A = 0.50, B = $2106 \times 10^{-5}$ ], <b>TA</b> [A = 0.50], <b>TL</b> [A = 0.50], <b>TF</b> [A = 0.50], <b>TN</b> [A = 0.50]                                                                                                                                                                                                                                                                                                |
| <b>VA</b> [A = 0.50, B = $297.20 \times 10^{-5}$ ], <b>VD</b> [A = 0.50], <b>VF</b> [A = 0.50], <b>VI</b> [A = 0.50], <b>VG</b> [A = 0.50], <b>VM</b> [A = 0.50], <b>VL</b> [A = 0.50, B = $675.68 \times 10^{-5}$ ], <b>VP</b> [A = 0.50, B = $56.82 \times 10^{-5}$ ], <b>VV</b> [A = 0.50], <b>VW</b> [A = 0.50]                                                                                                                                                                 |
| <b>WG</b> [A = 0.50], <b>WH</b> [A = 0.50], <b>WN</b> [A = 0.50, B = $336.70 \times 10^{-5}$ ], <b>WP</b> [A = 0.50, B = $11.04 \times 10^{-5}$ ], <b>WY</b> [A = 0.50, B = $177.94 \times 10^{-5}$ ], <b>WV</b> [A = 0.50, B = $761.15 \times 10^{-5}$ ]                                                                                                                                                                                                                           |
| <b>YP</b> [A = 0.50, B = $15.77 \times 10^{-5}$ ], <b>YQ</b> [A = 0.50], <b>YL</b> [A = 0.50], <b>YE</b> [A = 0.50], <b>YPY</b> [A = 1.00, B = $147.30 \times 10^{-5}$ ], <b>YA</b> [A = 0.50], <b>YG</b> [A = 0.50], <b>YK</b> [A = 0.50]                                                                                                                                                                                                                                          |

<sup>a</sup>Peptide fragments (alphabetical order) with DPP IV inhibitory activity were identified by BIOPEP database as mentioned in Table 2a and 2b. A = alanine, D = aspartic acid, F = phenylalanine, G = glycine, H = histidine, I = isoleucine, K = lysine, L = leucine, M = methionine, P = proline, Q = glutamine, R = arginine, S = serine, T = threonine, V = valine, W = tryptophan. A peptide's activity is predicted using two quantitative parameters: the occurrence frequency value (A) and the prospective biological activity (B). To evaluate the bioactivity of a peptide included in the query sequence, the A value, which is the frequency of bioactive fragments occurring in a protein sequence, is analyzed. The B value, which is a possible biological activity of protein fragments, is derived based on the IC<sub>50</sub> or EC<sub>50</sub> value of peptides available in the literature. As a result, peptides with higher A and B values, particularly B values, are expected to inhibit DPP IV more effectively. Reference- Nong, N.T.P. and Hsu, J.L., 2021. Characteristics of Food Protein-Derived Antidiabetic Bioactive Peptides: A Literature Update. *International Journal of Molecular Sciences*, 22(17), 9508.
